# Supplementary material for: Cardiopulmonary Events of the Elderly (≥75 Years) during Clazosentan Therapy after Subarachnoid Hemorrhage: A Retrospective Study from a Tertiary Stroke Center in Japan
Source: MDPI journal article supplement (doi:10.3390/medicina60010185), 2024-01-21
Supplement: s1 [file s1]

**Table S1.** Baseline characteristics and univariate analysis for clazosentan therapy between completed and discontinued groups among 33 consecutive SAH patients.

|                                                   | Total<br>(n=33) | Completed<br>(n=26) | Discontinued<br>(n=7) | <i>P</i>         |
|---------------------------------------------------|-----------------|---------------------|-----------------------|------------------|
| Age (y)                                           | 63.5 (14.0)     | 60.8 (12.9)         | 67.0 (15.3)           | 0.29             |
| Elderly (≥75 y), n                                | 6 (18)          | 3 (12)              | 3 (43)                |                  |
| Younger (<75 y), n                                | 27 (82)         | 23 (88)             | 4 (57)                |                  |
| Women                                             | 26 (79)         | 20 (77)             | 6 (86)                | 0.53             |
| Body weight (kg)                                  | 59.4 (11.6)     | 60.0 (12.0)         | 58.8 (11.5)           | 0.13             |
| WFNS grade                                        | 2.2 (1.5)       | 2.4 (1.6)           | 2.0 (1.5)             | 0.54             |
| Location of aneurysms                             |                 |                     |                       |                  |
| Anterior circulation                              | 31 (94)         | 24 (92)             | 7 (100)               |                  |
| Posterior circulation                             | 2 (6)           | 2 (8)               | 0 (0)                 |                  |
| Treatment                                         |                 |                     |                       |                  |
| Endovascular coiling                              | 9 (33)          | 8 (31)              | 1 (14)                |                  |
| Surgical clipping                                 | 22 (67)         | 16 (69)             | 6 (86)                |                  |
| Duration of drug therapy                          | 8.7 (2.2)       | 13.1 (1.7)          | 4.7 (2.4)             | <b>&lt;0.001</b> |
| Minimal urine volume                              |                 |                     |                       |                  |
| 24-h volume (mL/d)                                | 1,730 (592)     | 2,171 (747)         | 1,285 (354)           | <b>0.005</b>     |
| Volume per hour (mL/kg/h)                         | 1.17 (0.68)     | 1.37 (0.85)         | 0.95 (0.31)           | <b>0.02</b>      |
| Day-to-day variance (mL/kg/h)                     | -0.75 (0.53)    | -0.51 (0.55)        | -0.96 (0.49)          | <b>0.04</b>      |
| Daily fluid balance at minimal urine volume(mL/d) | 1,995 (826)     | 1,965 (796)         | 2,068 (878)           | 0.77             |
| Weight gain (kg)                                  | 2.7 (1.6)       | 2.2 (1.4)           | 3.2 (1.8)             | 0.09             |
| Vasospasm                                         | 9 (27)          | 6 (23)              | 3 (43)                | 0.28             |
| DCI                                               | 5 (15)          | 3 (12)              | 2 (29)                | 0.28             |
| 90-d mRS 0–2                                      | 25 (76)         | 20 (77)             | 5 (71)                | 0.61             |

Data are shown as mean (standard deviation) or number (percentage). Statistically significant results at  $P < 0.05$  are shown in bold.

DCI, delayed cerebral ischemia; eGFR, estimated glomerular filtration rate; mRS, modified Rankin scale; SAH, subarachnoid hemorrhage; WFNS, World Federation of Neurosurgical Societies.
